# Supplementary material
Source: PubMed Central journal article supplement (PMC7063832)

Figure S1. Putative fragmentation schemes described in Figure 2 and Table S1.

Putative fragmentation scheme of Reserpine

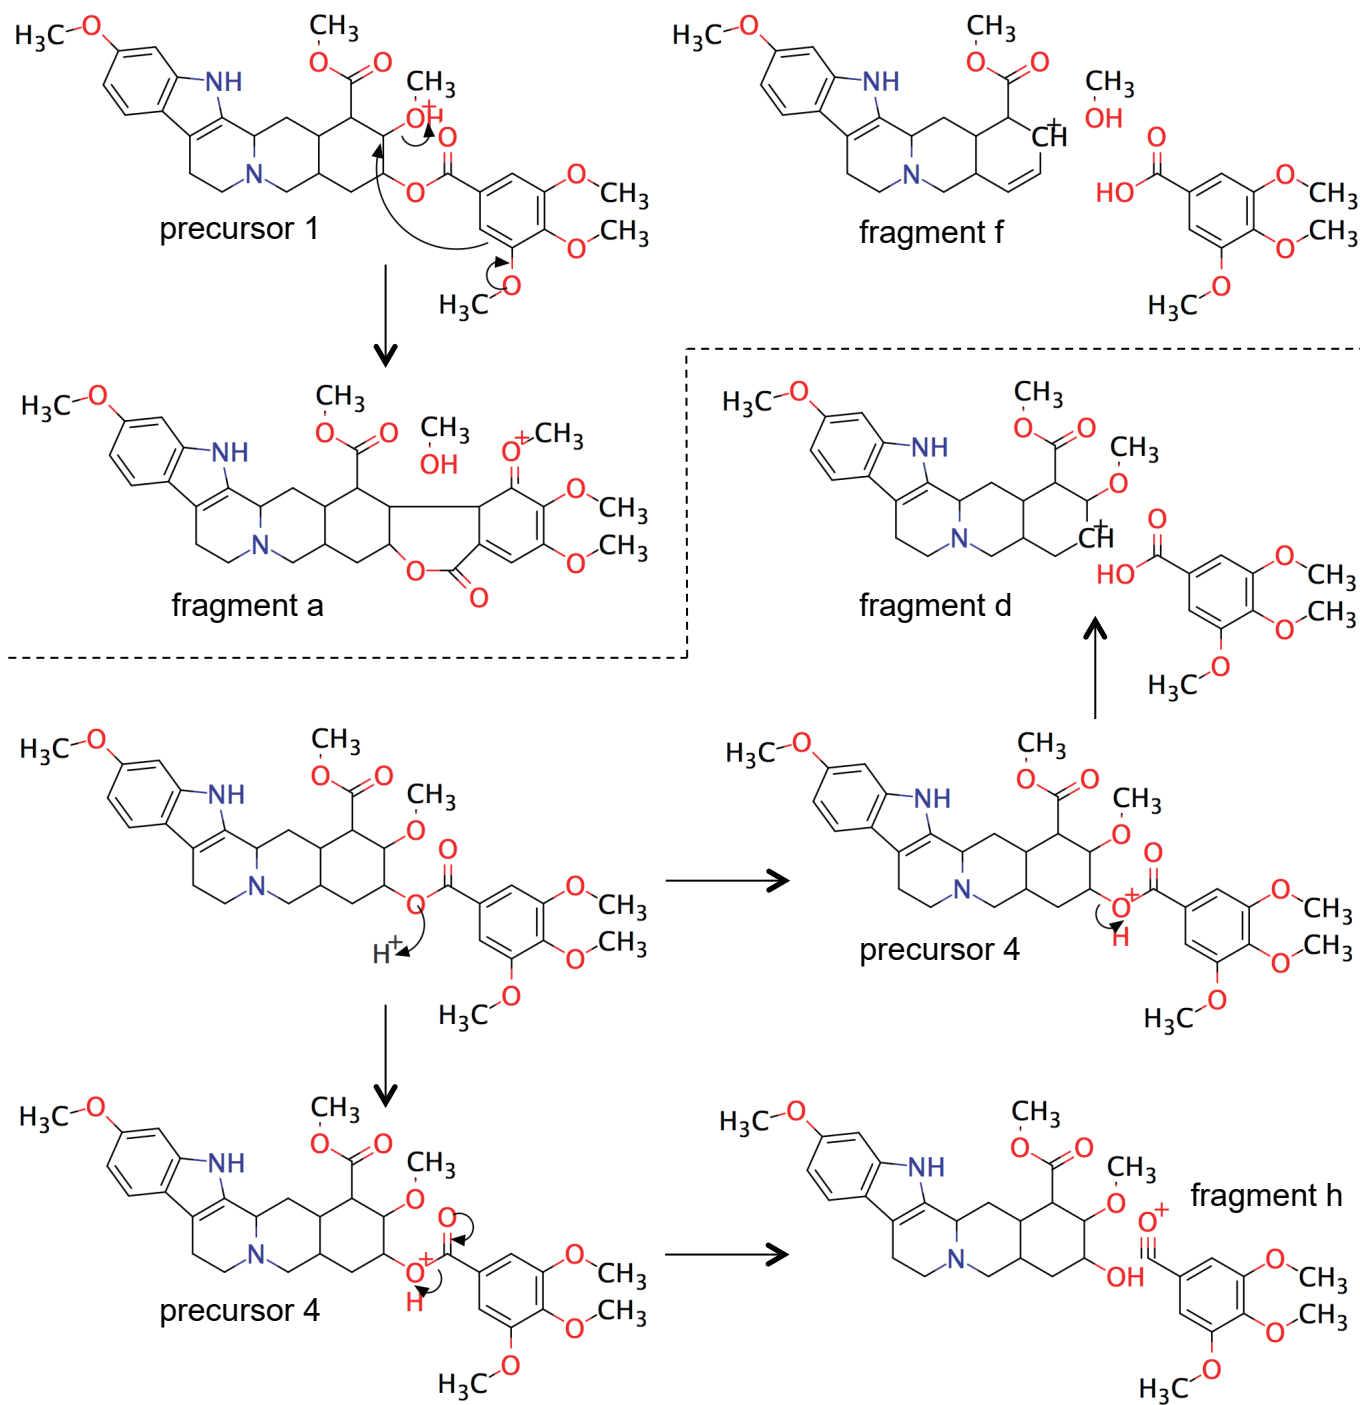

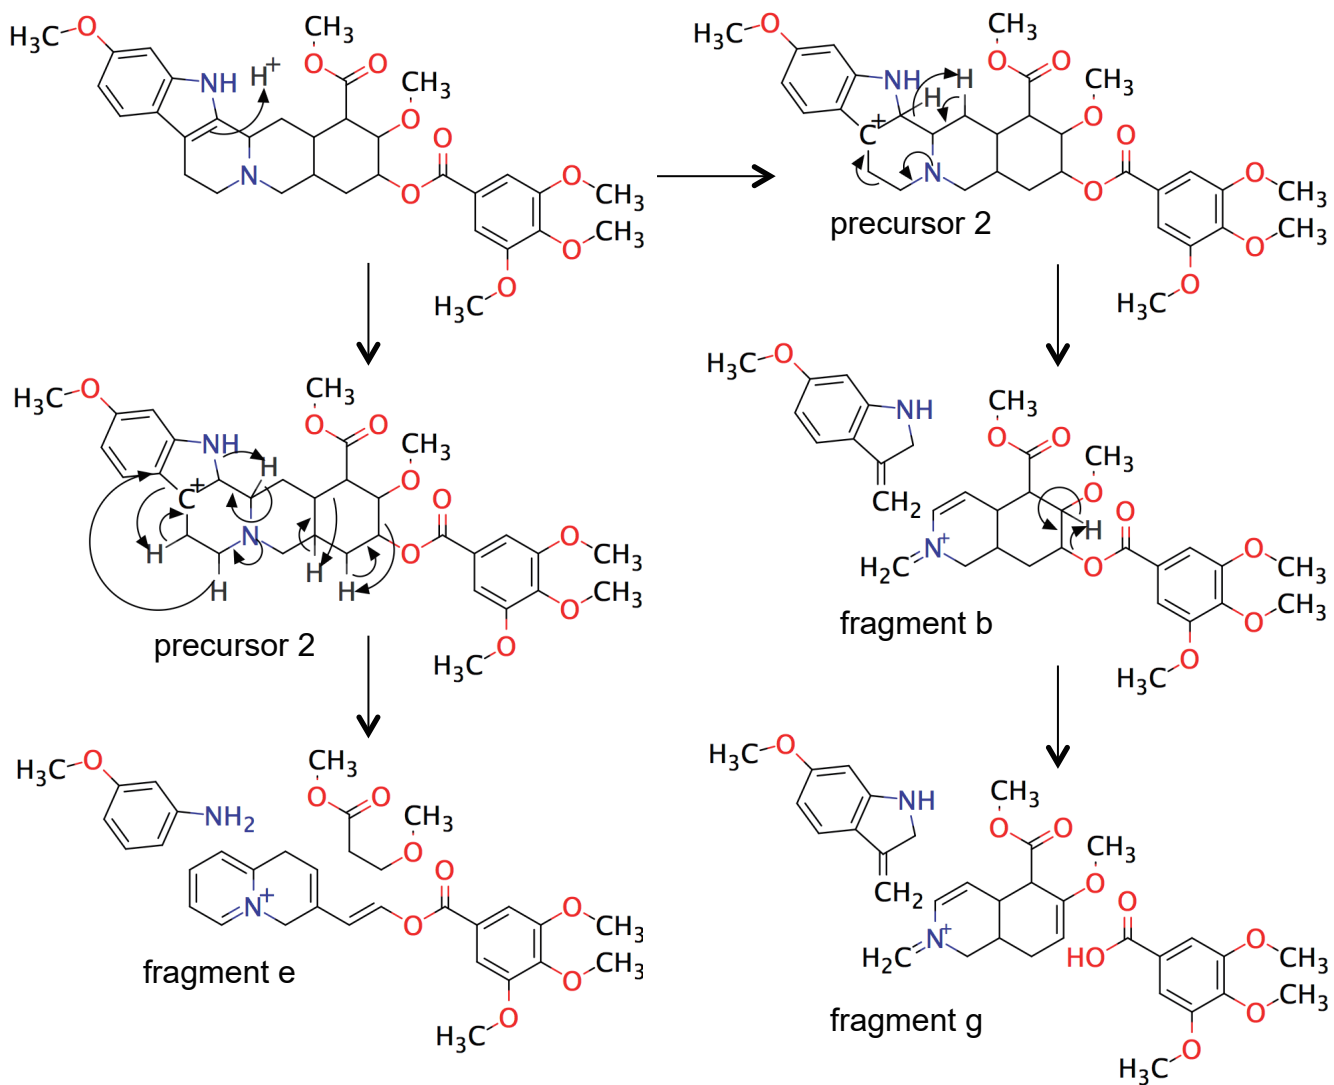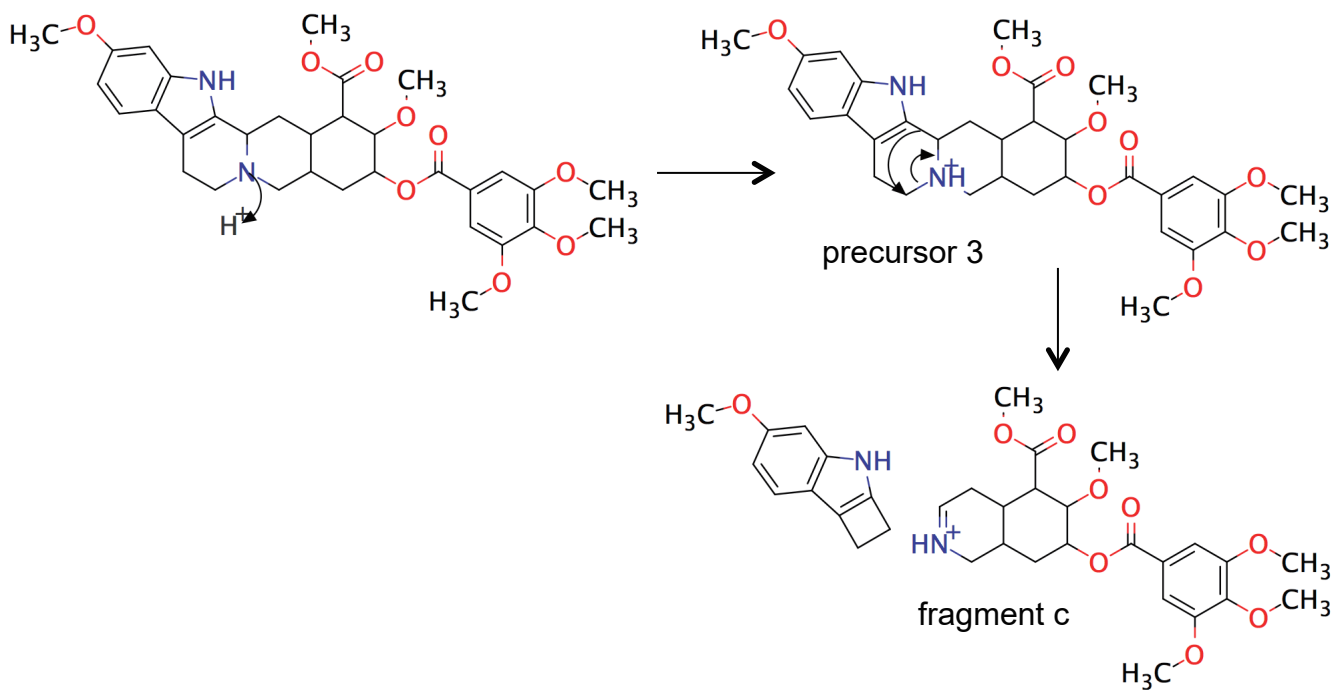

# Putative fragmentation scheme of 2'-deoxycytidine 5'-diphosphate

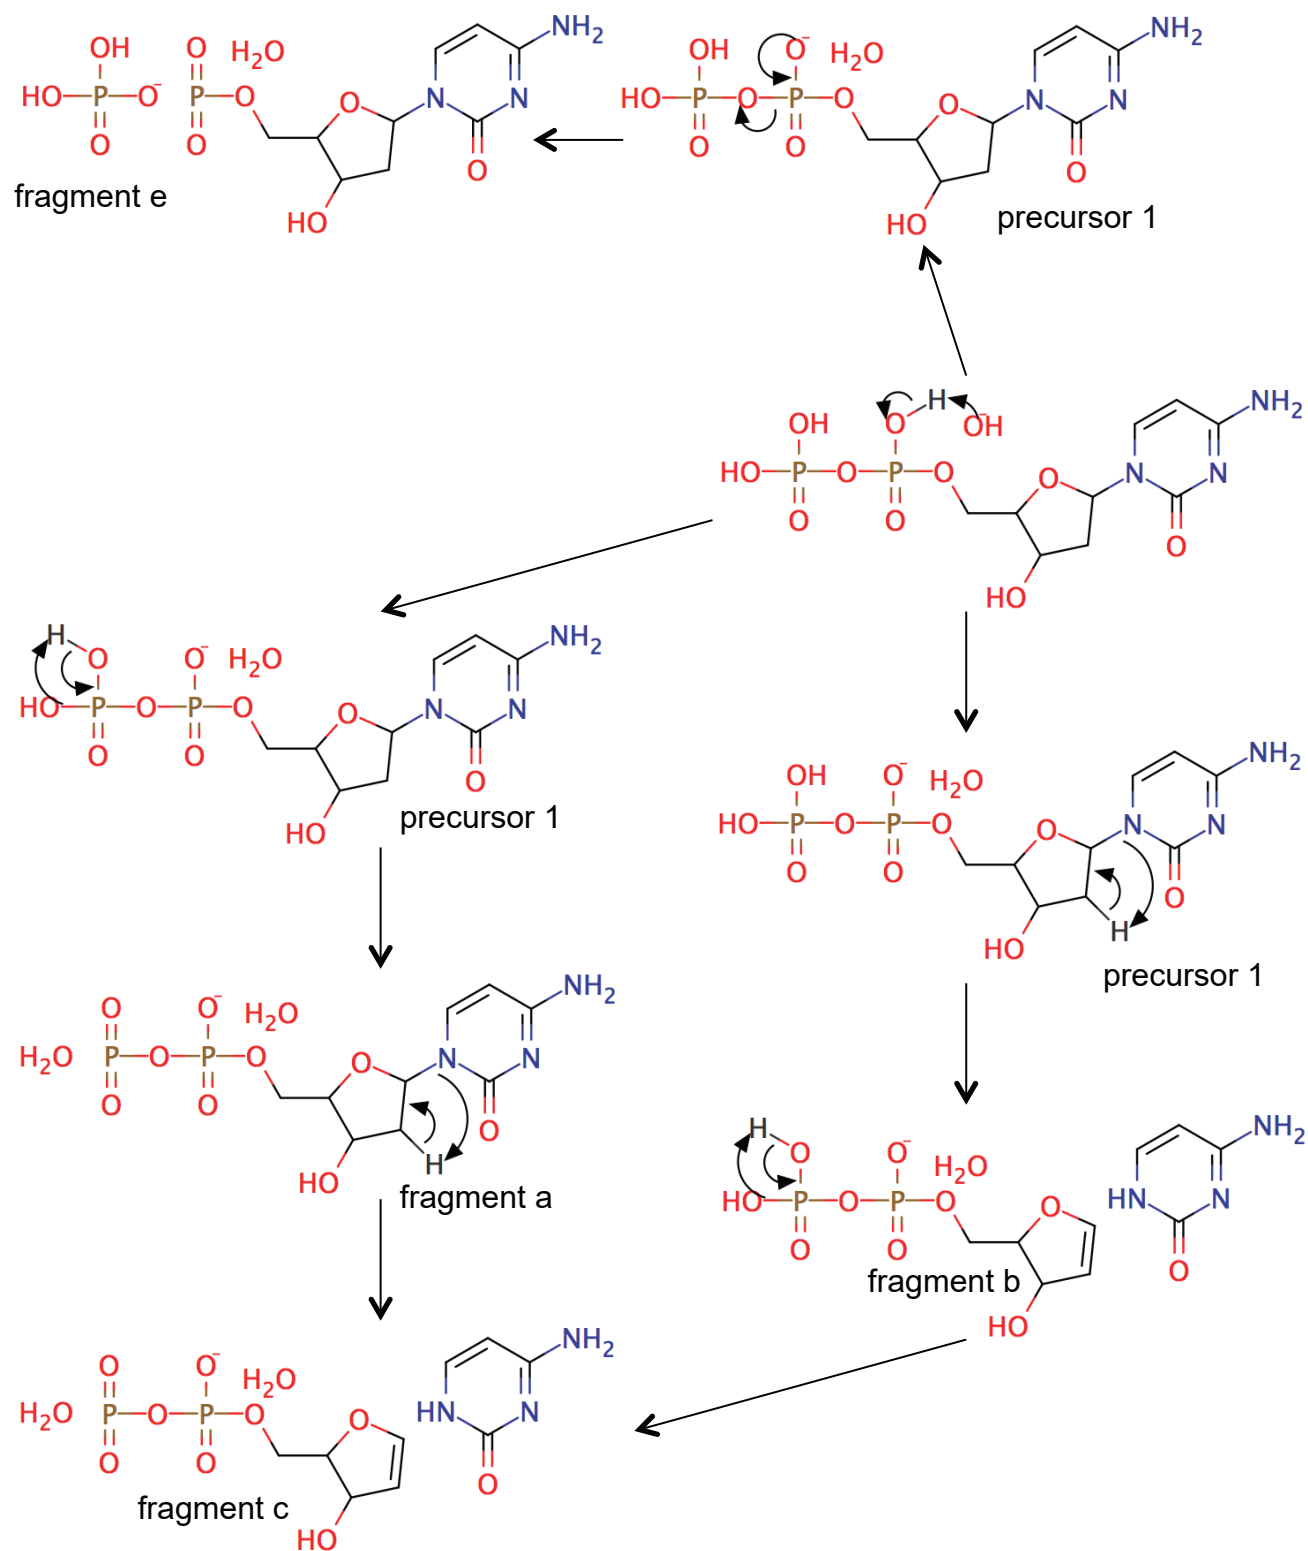

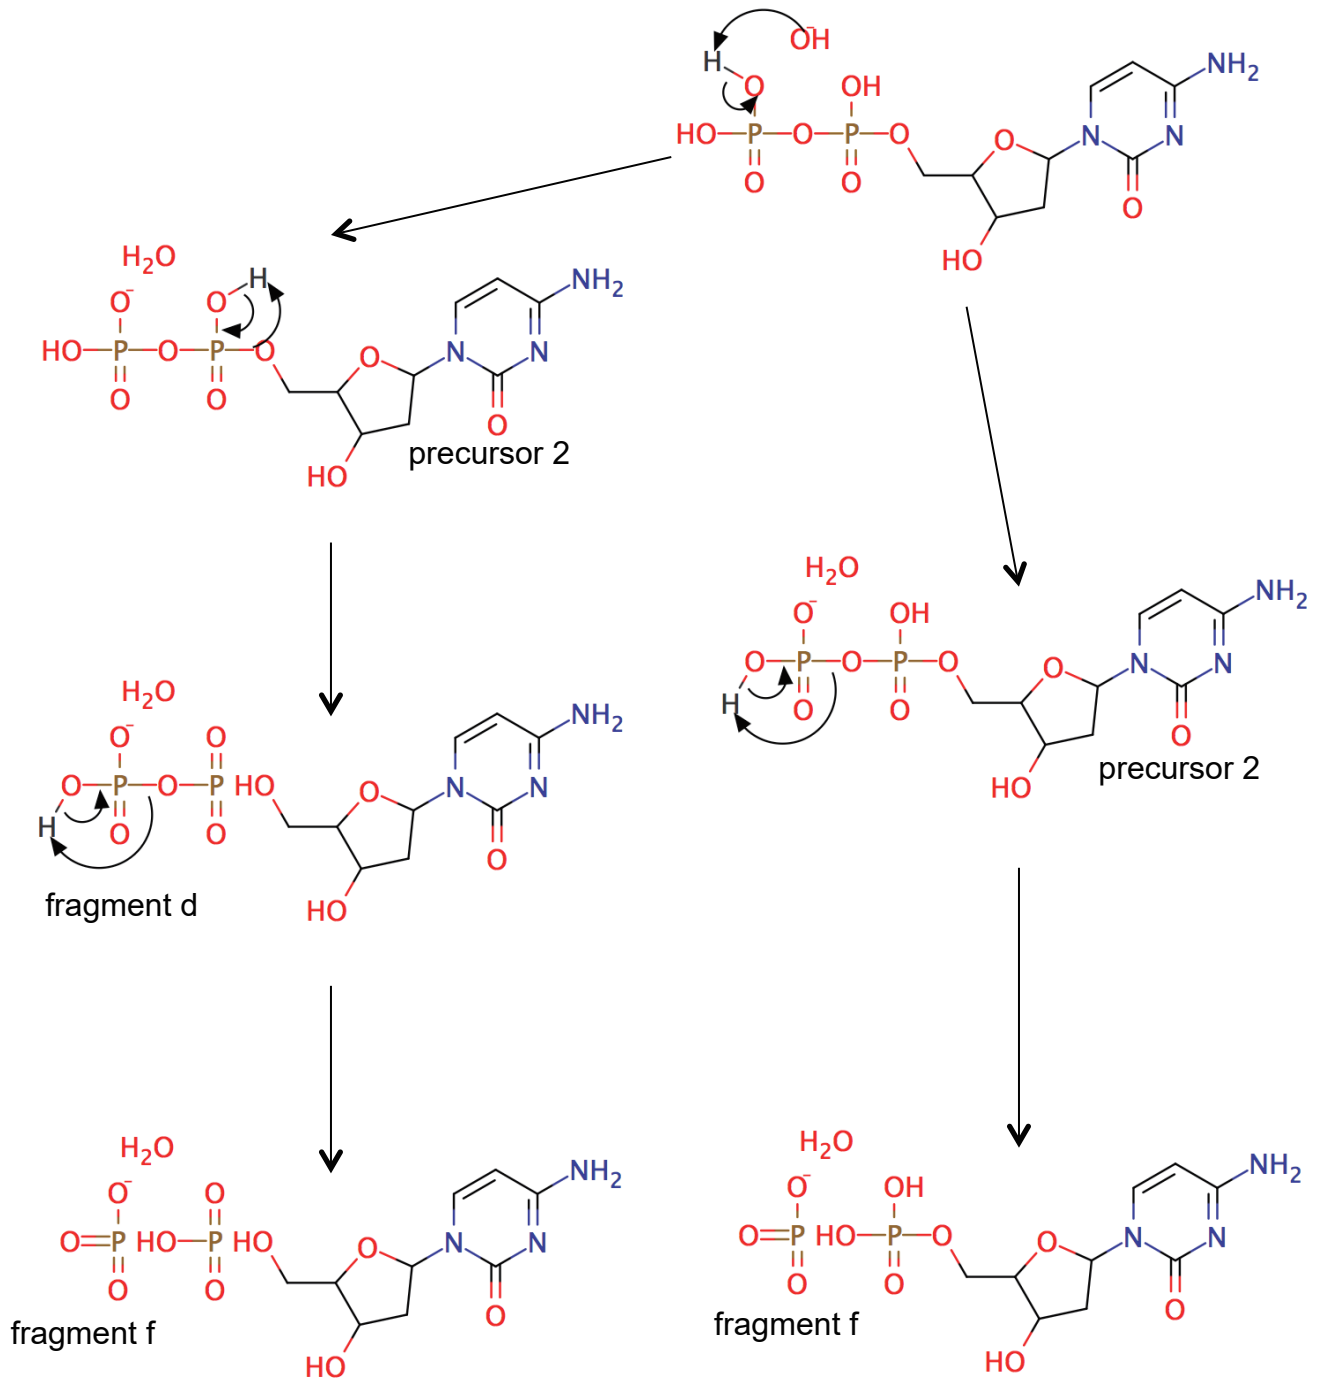

# Putative fragmentation scheme of 3-indoxyl sulfate

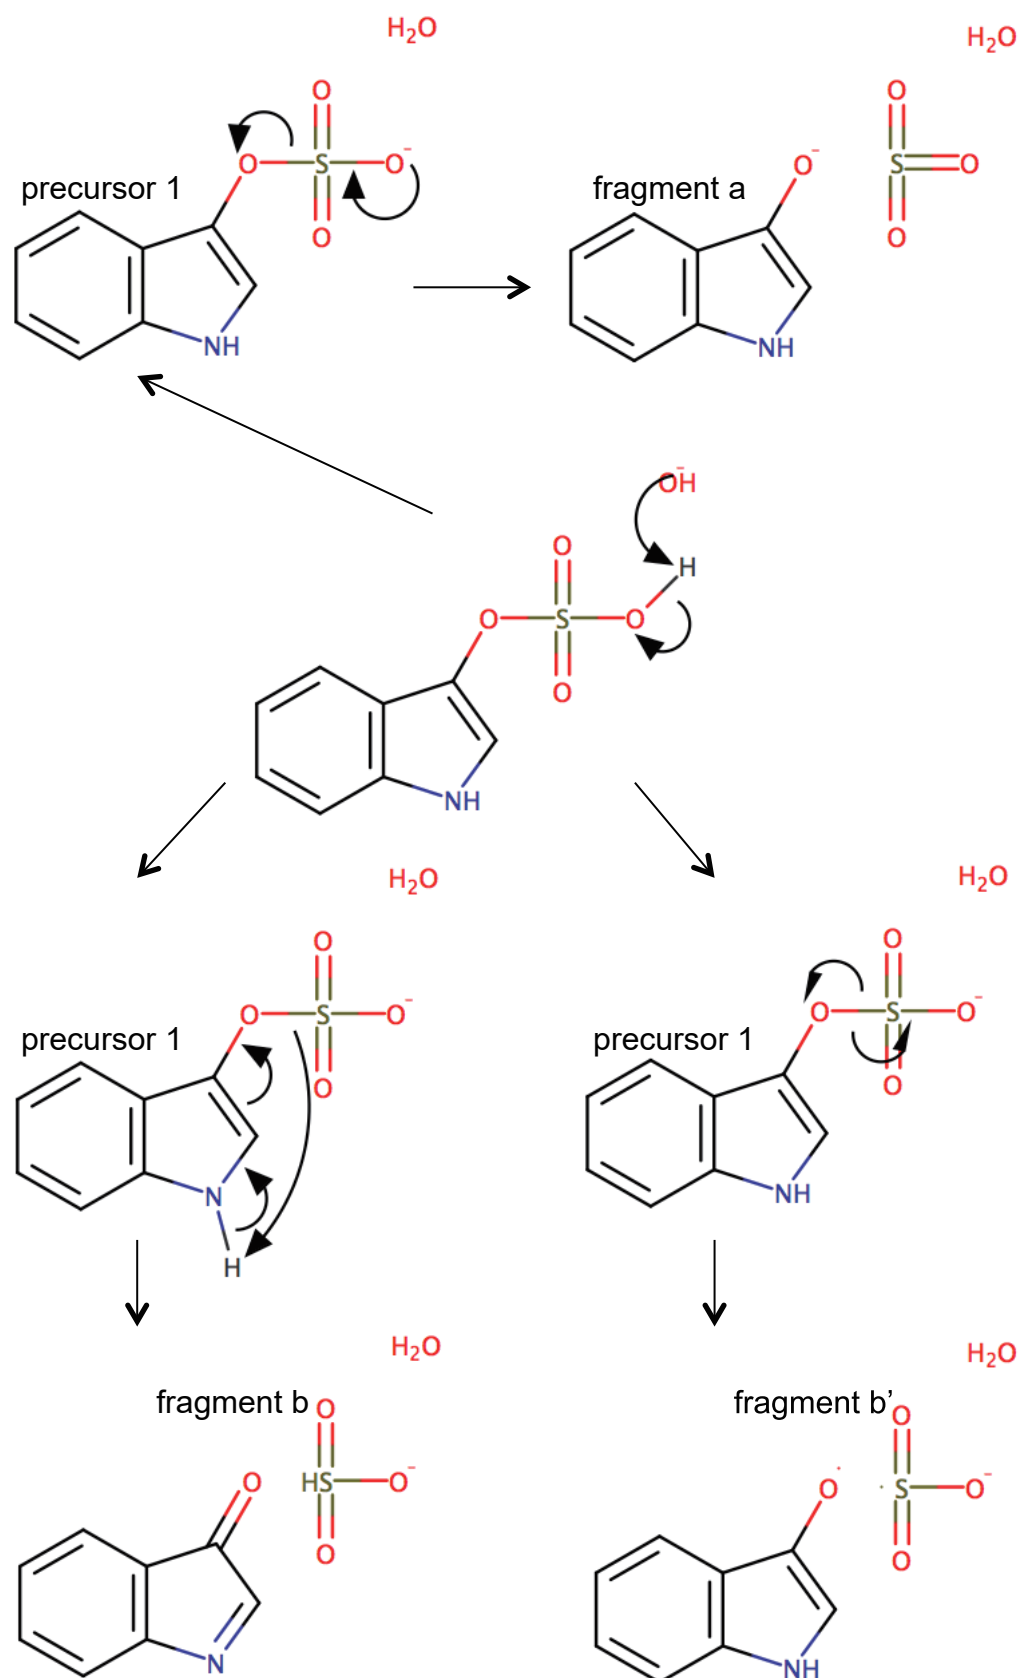

Supplement: NIHMS869808-supplement-support_info__2.pdf [file NIHMS869808-supplement-support_info__2.pdf]
