# Supplementary material
Source: PubMed Central journal article supplement (PMC7063832)

**Figure S2. Peak annotation result of guanosine 5'-diphosphoglucose MS/MS spectra, and the putative fragmentation scheme**

### Guanosine 5'-diphosphoglucose

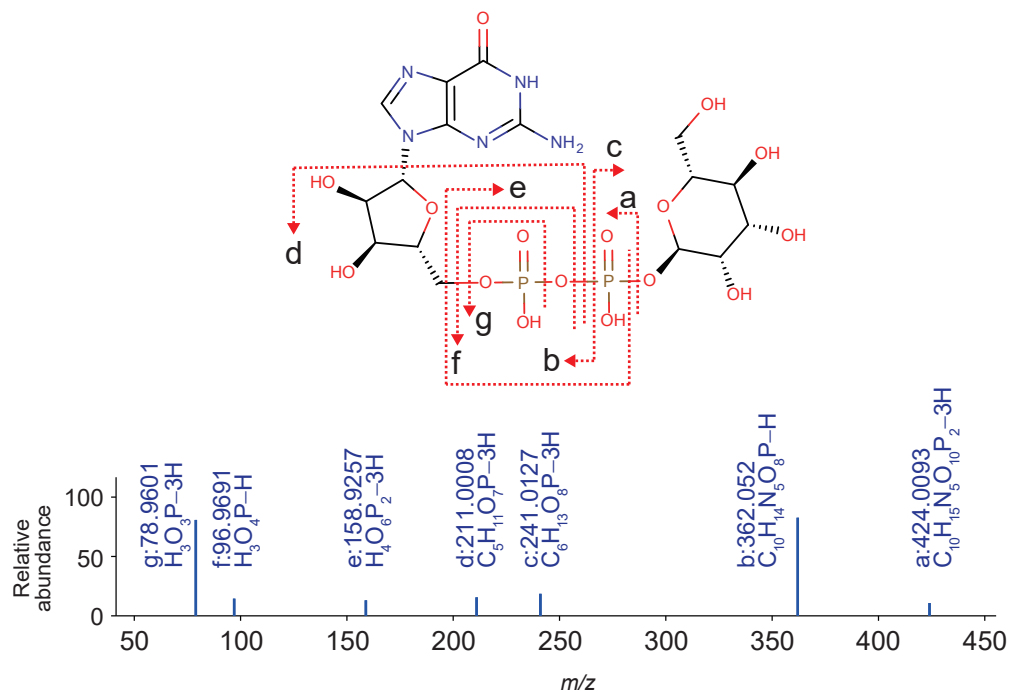

| Fragment | Hydrogen rearrangement | Rule             | Annotation | Theoretical $m/z$ | Error (mDa) | Enthalpy change (kcal/mol) |
|----------|------------------------|------------------|------------|-------------------|-------------|----------------------------|
| a        | P -2                   | N2               | [M-3H]-    | 424.0059          | 3.36        | -57.7                      |
| b        | O 0                    | N1               | [M-H]-     | 362.0502          | 1.83        | -49.1                      |
| c        | P -2                   | N2               | [M-3H]-    | 241.0113          | 1.37        | 12.2                       |
| d        | C -2, O 1              | N2, N4           | [M-3H]-    | 211.0008          | 1.04        | -15.0                      |
| e        | P -2, O 1 or O 0, P -1 | N2, N4 or N1, N5 | [M-3H]-    | 158.9248          | 0.86        | -33.8                      |
| f        | O 0, O -1              | N1, N5           | [M-H]-     | 96.9691           | 1.03        | -20.1                      |
| g        | P -2, O 1 or O 0, P -1 | N2, N4 or N1, N5 | [M-3H]-    | 78.9585           | 1.59        | -32.1                      |

# Putative fragmentation scheme of Guanosine 5'-diphosphoglucose

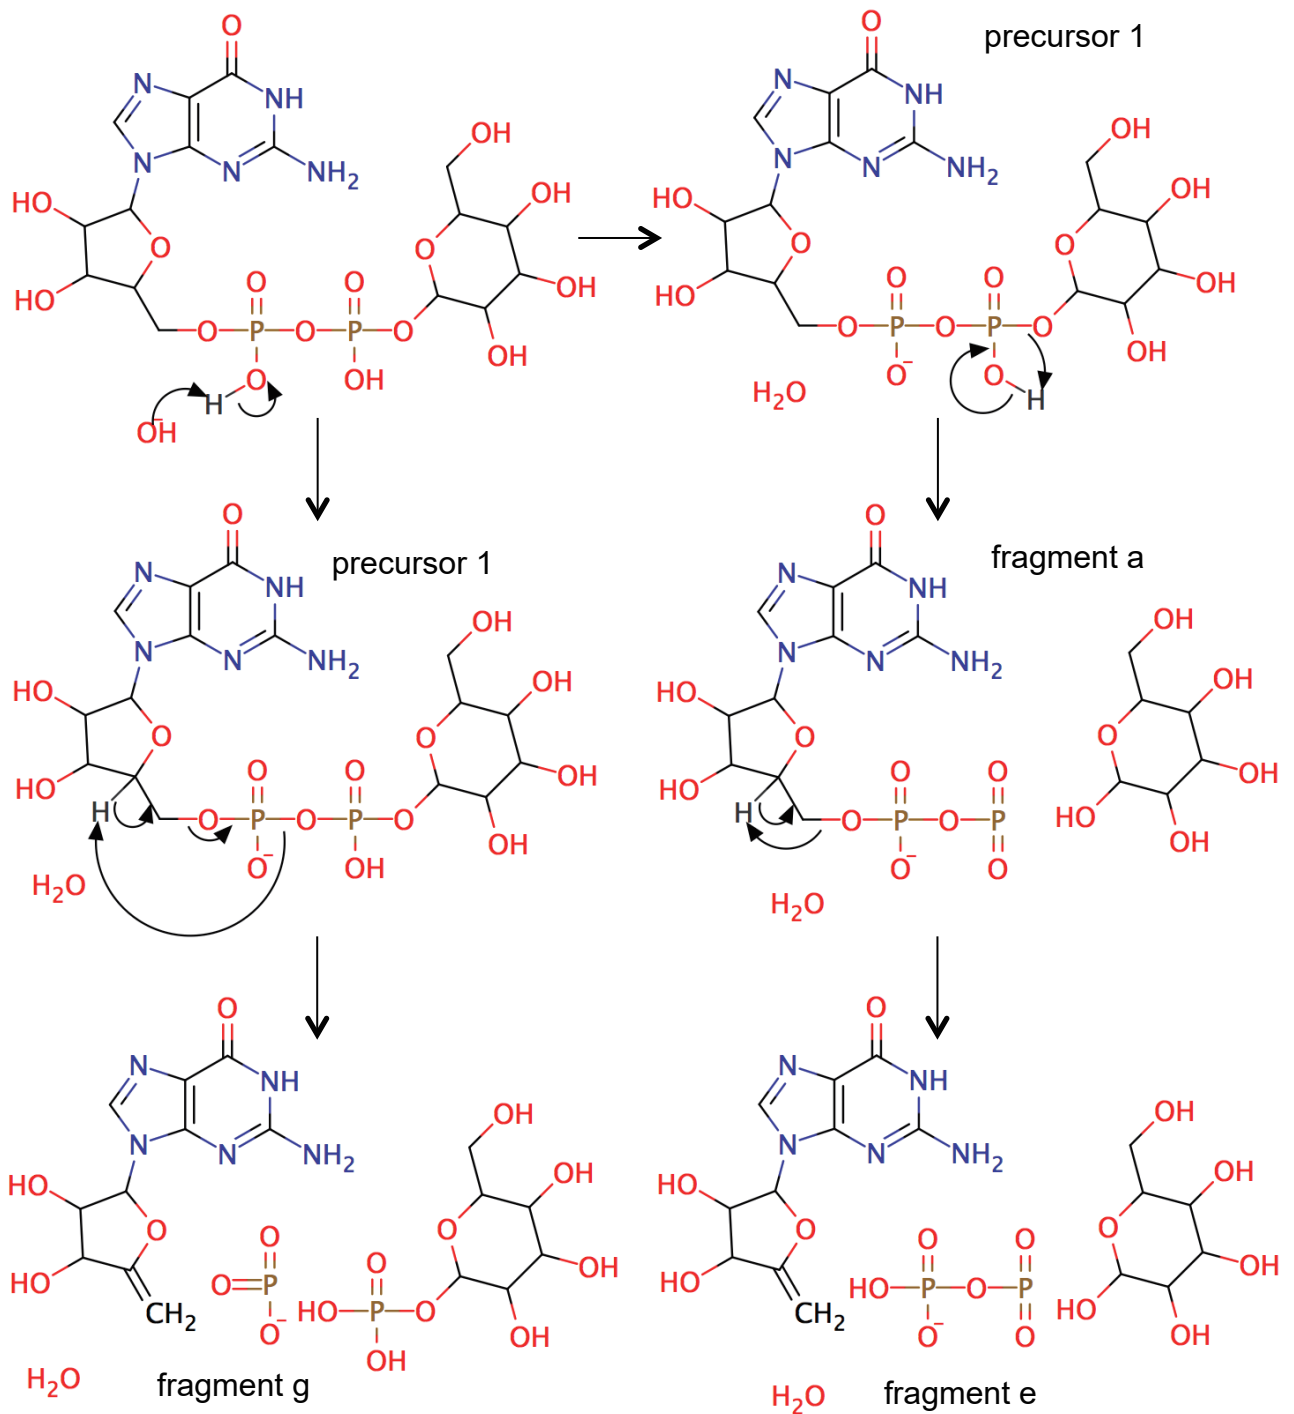

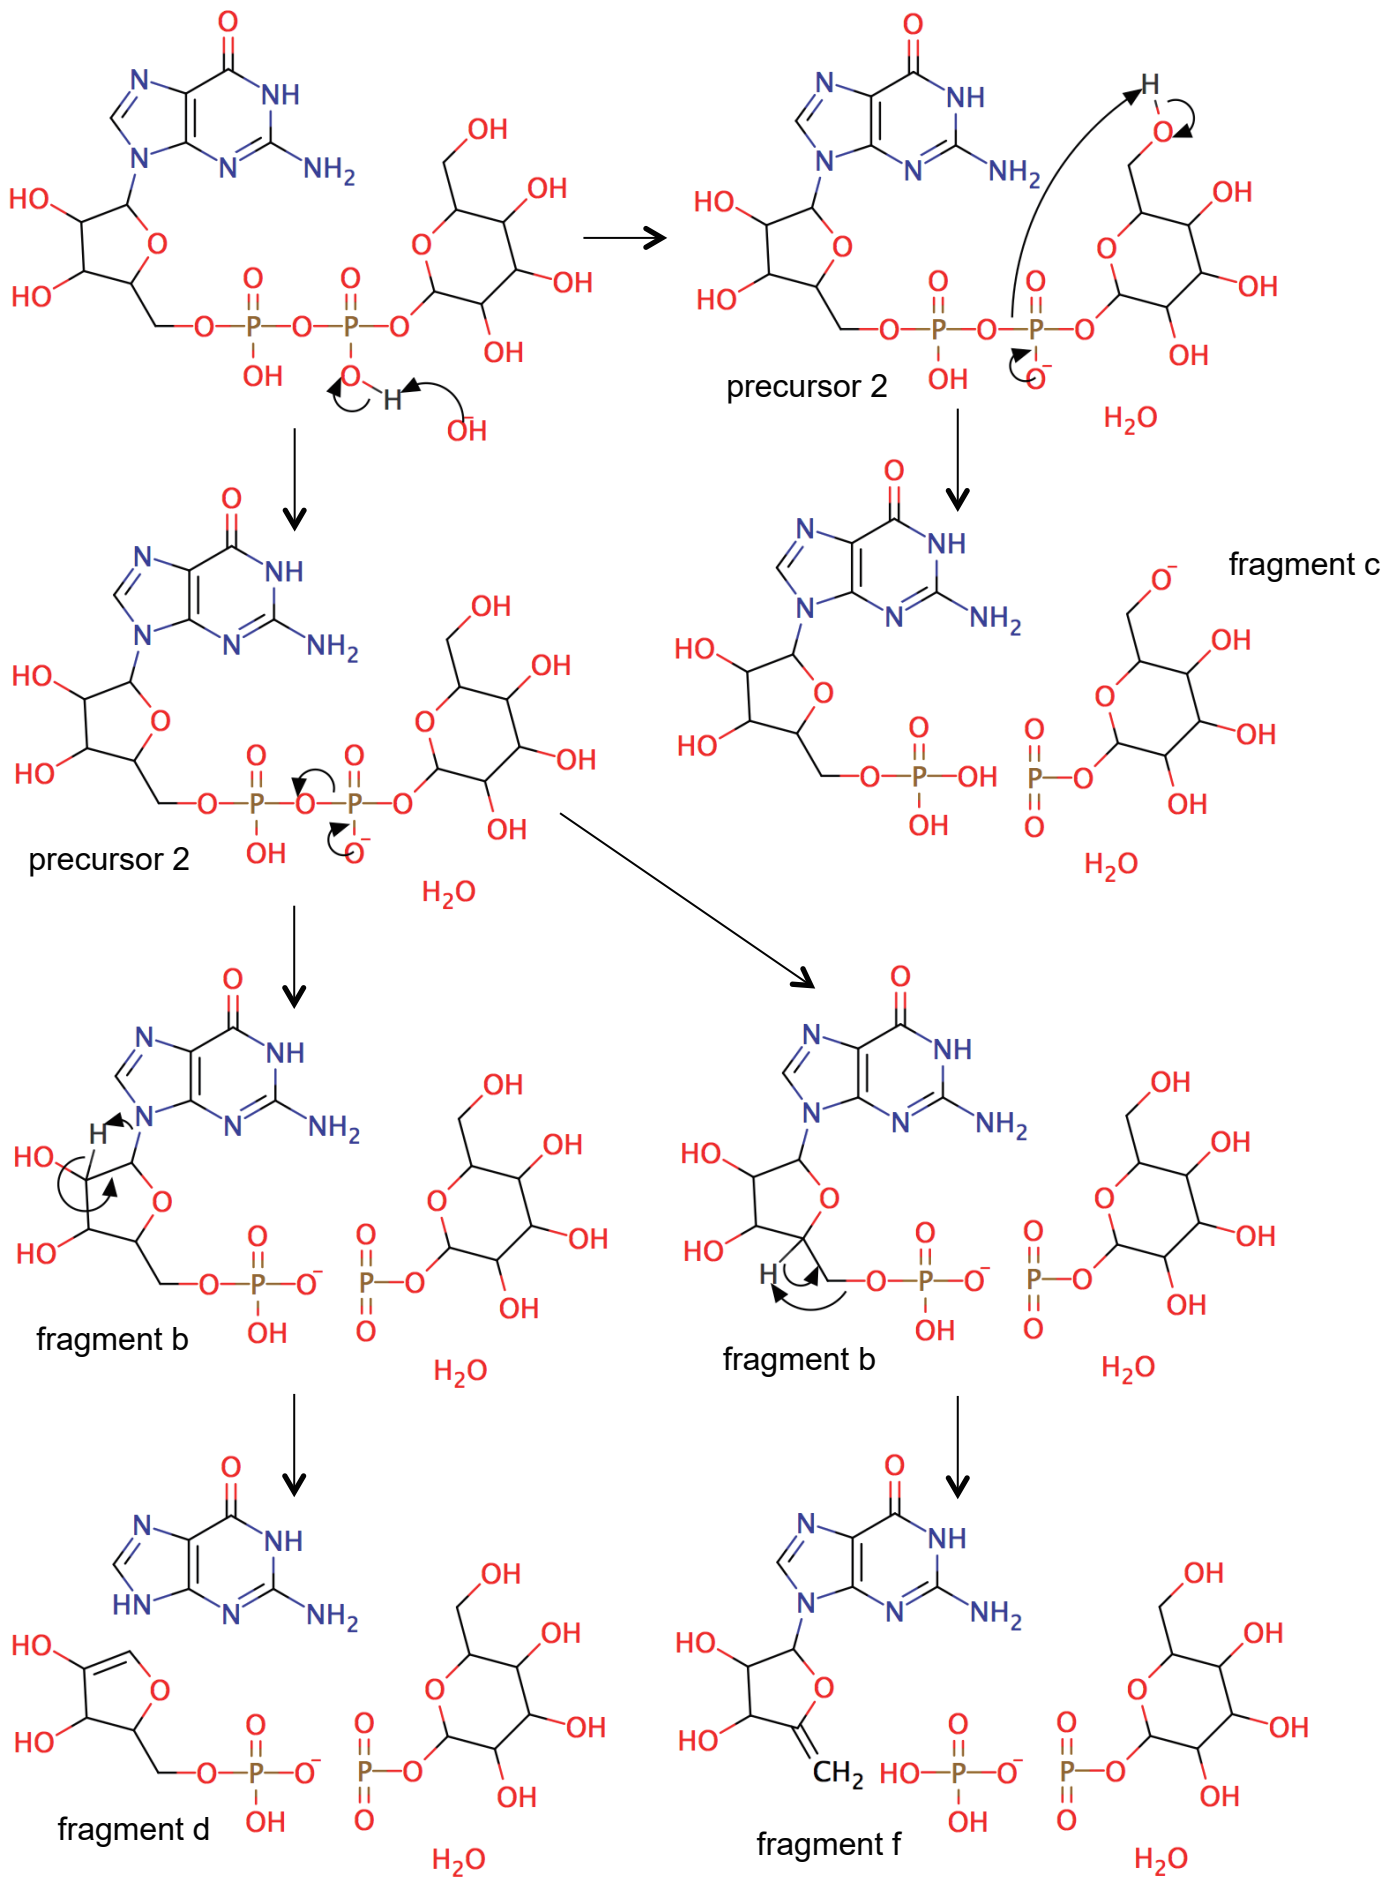

Supplement: NIHMS869808-supplement-support_info__3.pdf [file NIHMS869808-supplement-support_info__3.pdf]
