# Supplementary material
Source: PubMed Central journal article supplement (PMC7063832)
Supplement: NIHMS869808-supplement-support_info__6.pdf [file NIHMS869808-supplement-support_info__6.pdf]

**Table S1. Statistics of hydrogen rearrangements for CNOPS elements in GNPS**

| Positive ion mode                                                |           |                        |              | Negative ion mode              |           |                        |            |
|------------------------------------------------------------------|-----------|------------------------|--------------|--------------------------------|-----------|------------------------|------------|
| C 79305, N 7444, O 17296 S 606, P 63                             |           |                        |              | C 2582, N 38, O 909, S 11, P 3 |           |                        |            |
| Cleavage                                                         | Element   | Hydrogen rearrangement | Count        | Cleavage                       | Element   | Hydrogen rearrangement | Count      |
| First bond cleavage<br>(ionized element behavior)                | <b>C</b>  | <b>0</b>               | <b>3729</b>  |                                | <b>C</b>  | <b>0</b>               | <b>40</b>  |
|                                                                  | C         | +1                     | 1115         |                                | C         | -1                     | 17         |
|                                                                  | C         | +2                     | 410          |                                | <b>C</b>  | <b>-2</b>              | <b>54</b>  |
|                                                                  | N         | 0                      | 289          |                                | <b>N</b>  | <b>0</b>               | <b>2</b>   |
|                                                                  | N         | +1                     | 153          |                                | N         | -1                     | 1          |
|                                                                  | <b>N</b>  | <b>+2</b>              | <b>470</b>   |                                | N         | -2                     | 0          |
|                                                                  | O         | 0                      | 109          |                                | <b>O</b>  | <b>0</b>               | <b>42</b>  |
|                                                                  | O         | +1                     | 163          |                                | O         | -1                     | 44         |
|                                                                  | <b>O</b>  | <b>+2</b>              | <b>418</b>   |                                | O         | -2                     | 0          |
|                                                                  | S         | 0                      | 72           |                                | <b>S</b>  | <b>0</b>               | <b>2</b>   |
|                                                                  | S         | +1                     | 13           |                                | S         | -1                     | 1          |
|                                                                  | <b>S</b>  | <b>+2</b>              | <b>18</b>    |                                | S         | -2                     | 0          |
|                                                                  | P         | 0                      | 9            |                                | <b>P</b>  | <b>0</b>               | <b>0</b>   |
| P                                                                | +1        | 0                      |              | P                              | -1        | 0                      |            |
| <b>P</b>                                                         | <b>+2</b> | <b>0</b>               |              | P                              | -2        | 0                      |            |
| Second and later bond cleavage<br>(neutralized element behavior) | <b>C</b>  | <b>-1</b>              | <b>20367</b> |                                | <b>C</b>  | <b>+1</b>              | <b>51</b>  |
|                                                                  | C         | 0                      | 1233         |                                | C         | 0                      | 21         |
|                                                                  | <b>C</b>  | <b>+1</b>              | <b>4445</b>  |                                | <b>C</b>  | <b>-1</b>              | <b>245</b> |
|                                                                  | <b>N</b>  | <b>-1</b>              | <b>535</b>   |                                | <b>N</b>  | <b>+1</b>              | <b>0</b>   |
|                                                                  | N         | 0                      | 84           |                                | N         | 0                      | 0          |
|                                                                  | <b>N</b>  | <b>+1</b>              | <b>1156</b>  |                                | <b>N</b>  | <b>-1</b>              | <b>1</b>   |
|                                                                  | <b>O</b>  | <b>-1</b>              | <b>258</b>   |                                | <b>O</b>  | <b>+1</b>              | <b>29</b>  |
|                                                                  | O         | 0                      | 28           |                                | O         | 0                      | 2          |
|                                                                  | <b>O</b>  | <b>+1</b>              | <b>1034</b>  |                                | <b>O</b>  | <b>-1</b>              | <b>8</b>   |
|                                                                  | <b>S</b>  | <b>-1</b>              | <b>102</b>   |                                | <b>S</b>  | <b>+1</b>              | <b>0</b>   |
|                                                                  | S         | 0                      | 12           |                                | S         | 0                      | 0          |
|                                                                  | <b>S</b>  | <b>+1</b>              | <b>39</b>    |                                | <b>S</b>  | <b>-1</b>              | <b>1</b>   |
|                                                                  | <b>P</b>  | <b>-1</b>              | <b>6</b>     |                                | <b>P</b>  | <b>+1</b>              | <b>0</b>   |
| P                                                                | 0         | 1                      |              | P                              | 0         | 0                      |            |
| <b>P</b>                                                         | <b>+1</b> | <b>1</b>               |              | <b>P</b>                       | <b>-1</b> | <b>0</b>               |            |

A total 35,738 (positive) and 632 (negative) MS/MS peaks within 50-mDa mass accuracy were classified as the same way as the statistics of MassBank.
