# Supplementary material
Source: PubMed Central journal article supplement (PMC7063832)
Supplement: NIHMS869808-supplement-support_info__7.pdf [file NIHMS869808-supplement-support_info__7.pdf]

**Table S2. Peak annotation details of Figure 2.**

| Compound name                   | Fragment | Hydrogen rearrangement   | Rule             | Annotation          | Theoretical <i>m/z</i> | Error (mDa) | Enthalpy change (kcal/mol) |
|---------------------------------|----------|--------------------------|------------------|---------------------|------------------------|-------------|----------------------------|
| Reserpine                       | a        | C 0                      | P1               | [M-H] <sup>+</sup>  | 577.2550               | 3.391       | -117.5                     |
|                                 | b        | C 0, C -1                | P1, P4           | [M-3H] <sup>+</sup> | 448.1971               | 2.042       | -122.9                     |
|                                 | c        | N +2, C -1 or C 0, N +1  | P2, P4 or P1, P3 | [M-H] <sup>+</sup>  | 436.1971               | 1.542       | -105.3                     |
|                                 | d        | C 0                      | P1               | [M-H] <sup>+</sup>  | 397.2127               | 2.332       | -115.8                     |
|                                 | e        | C 0, C -1, C -1, C -1    | P1, P4, P4, P4   | [M-7H] <sup>+</sup> | 368.1498               | 1.898       | -135.8                     |
|                                 | f        | C 0, C -1                | P1, P4           | [M-3H] <sup>+</sup> | 365.1865               | 1.518       | -116.4                     |
|                                 | g        | C 0, C -1, C -1          | P1, P4, P4, P4   | [M-5H] <sup>+</sup> | 236.1287               | 1.968       | -117.7                     |
|                                 | h        | C 0                      | P1               | [M-H] <sup>+</sup>  | 195.0657               | 0.834       | -136.0                     |
| 2'-deoxycytidine 5'-diphosphate | a        | P -2                     | N2               | [M-3H] <sup>-</sup> | 368.0049               | 1.877       | -59.3                      |
|                                 | b        | C -2                     | N2               | [M-3H] <sup>-</sup> | 274.9722               | 0.920       | -49.8                      |
|                                 | c        | C -2, P -1 or P -2, C -1 | N2, N5           | [M-5H] <sup>-</sup> | 256.9616               | 0.015       | -30.0                      |
|                                 | d        | P -2                     | N2               | [M-3H] <sup>-</sup> | 158.9248               | 0.064       | -47.9                      |
|                                 | e        | O 0                      | N1               | [M-H] <sup>-</sup>  | 96.9691                | 0.230       | -31.3                      |
|                                 | f        | P -2                     | N2               | [M-3H] <sup>-</sup> | 78.9585                | 1.195       | -48.0                      |
| 3-indoxyl sulfate               | a        | O 0                      | N1               | [M-H] <sup>-</sup>  | 132.0449               | 1.061       | -32.8                      |
|                                 | b        | S 0                      | N1               | [M-H] <sup>-</sup>  | 80.9646                | 1.860       | -37.4                      |
|                                 | b'       | S -1                     | N3               | [M-2H] <sup>-</sup> | 79.9568                | 1.985       | -31.3                      |

The alphabet for each fragment matches that of Figure 3. The enthalpy change from the precursor to the product ion fragment was calculated with the MOPAC package.
