# Supplementary material
Source: PubMed Central journal article supplement (PMC7063832)

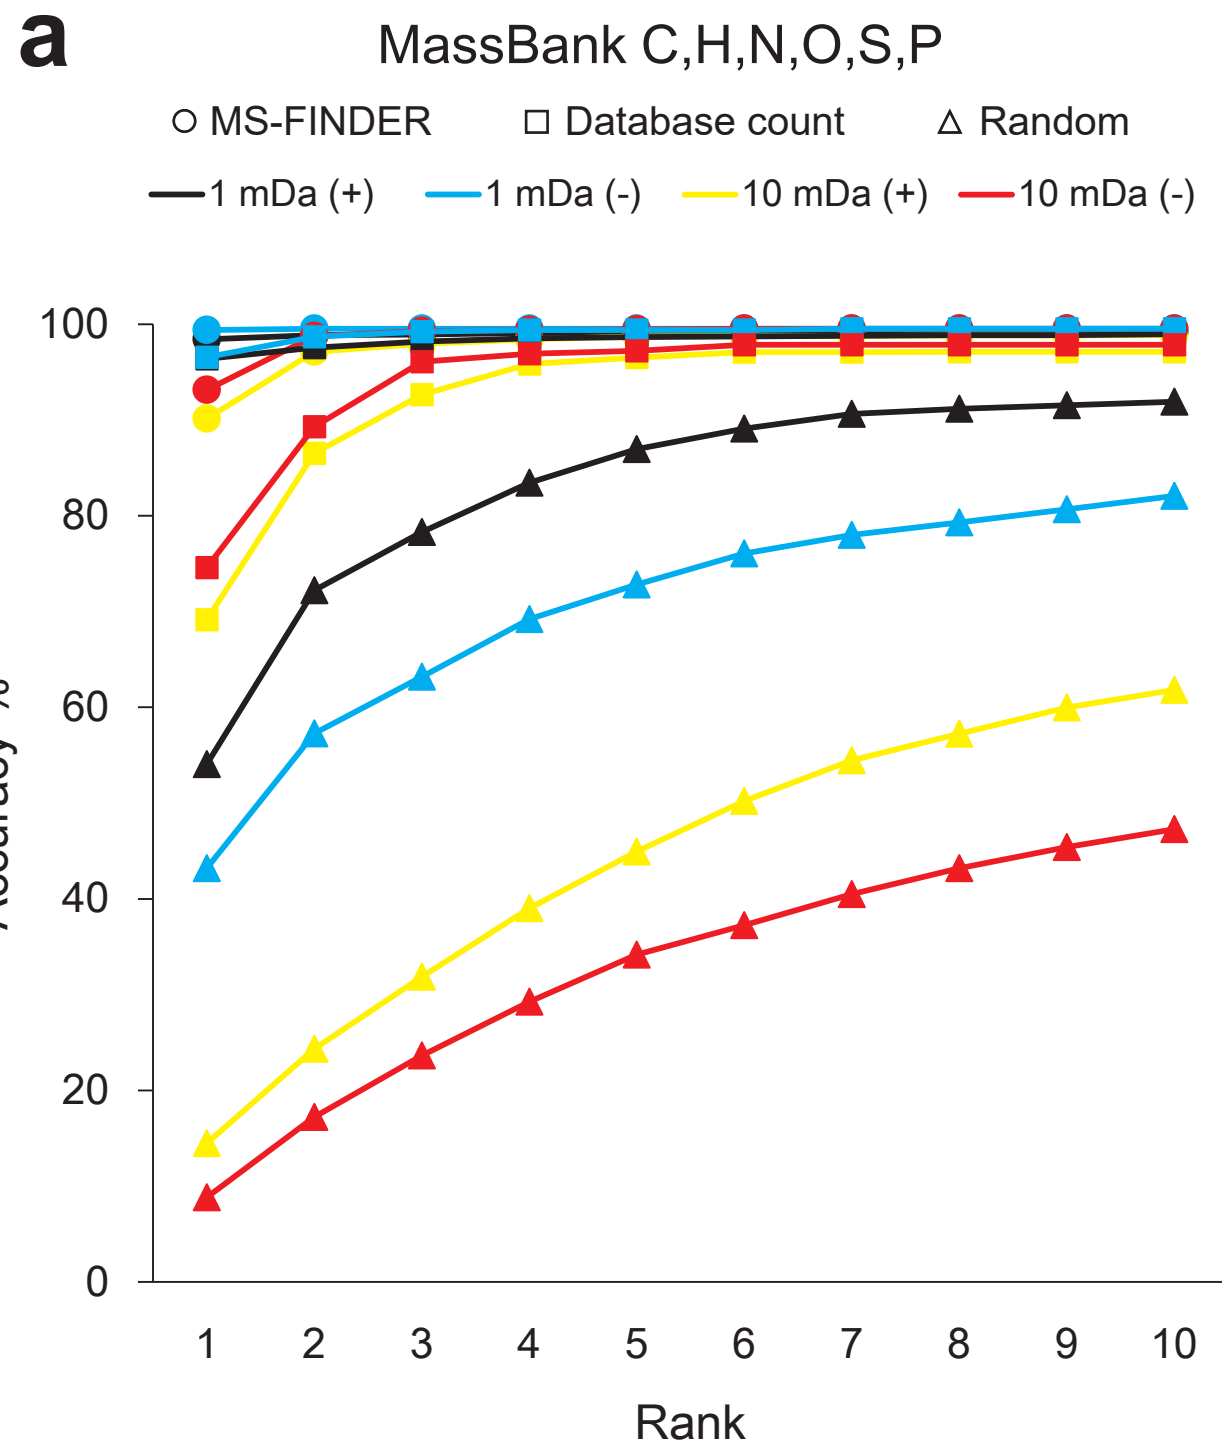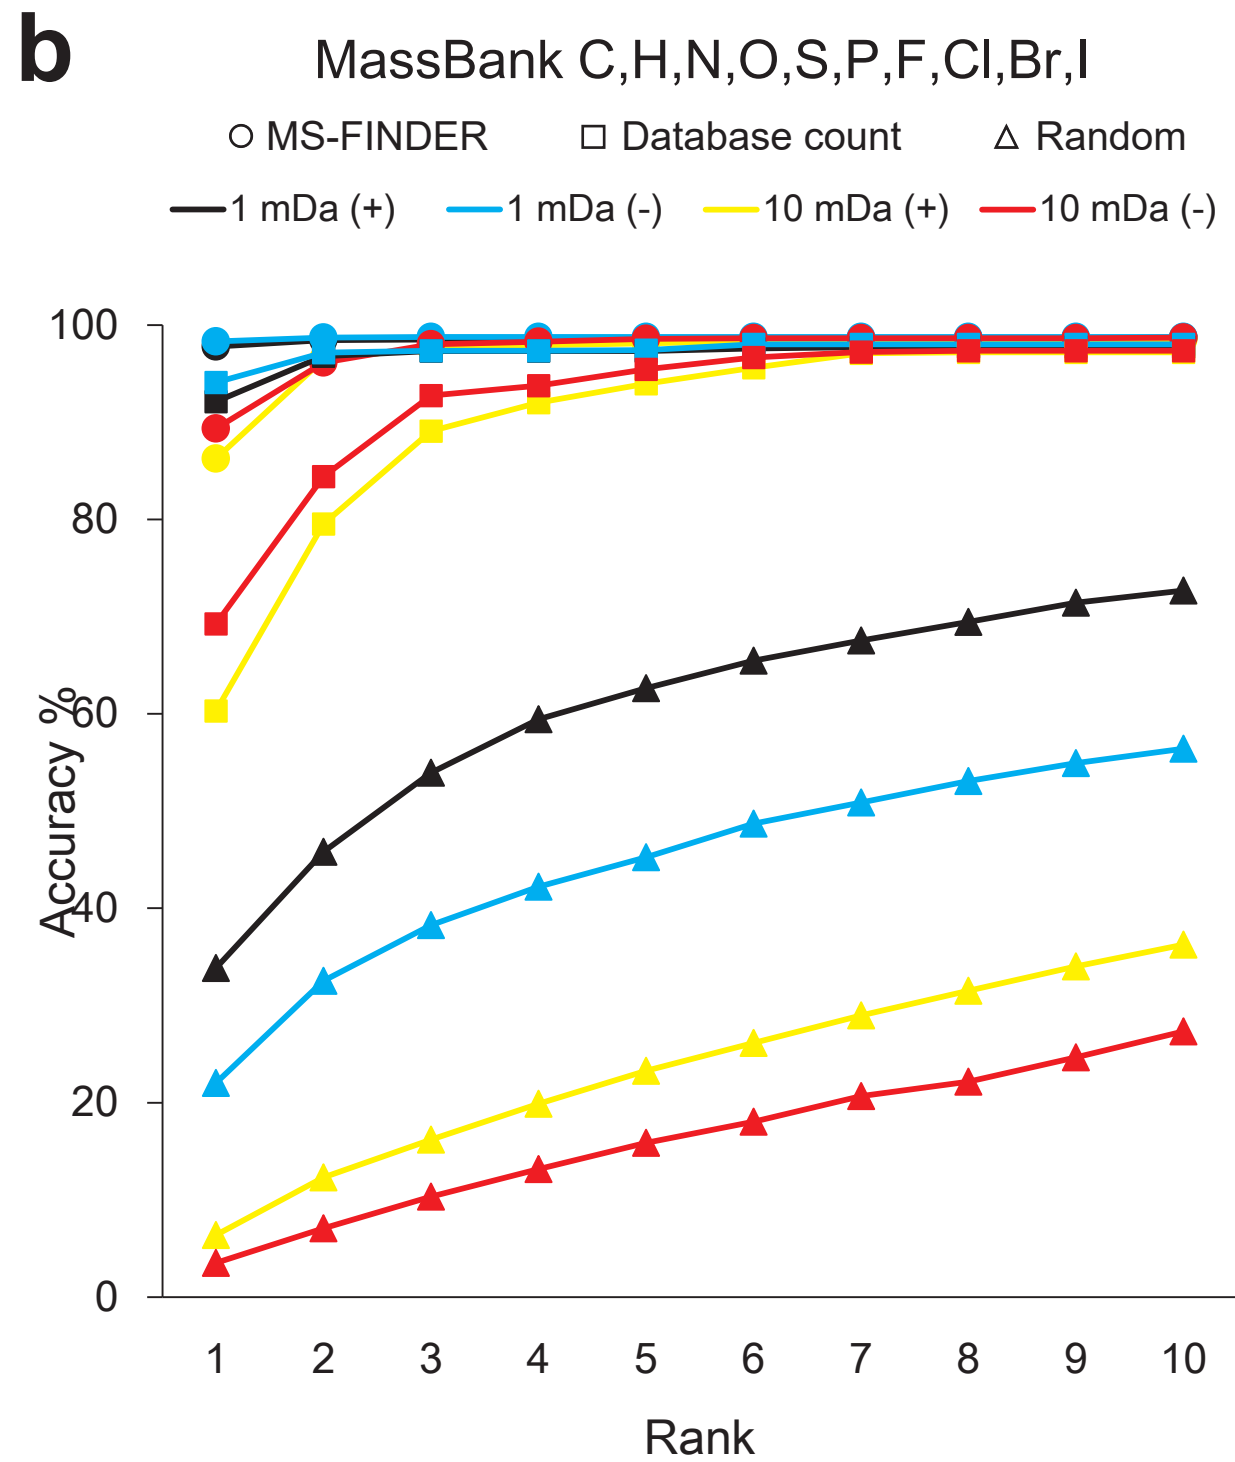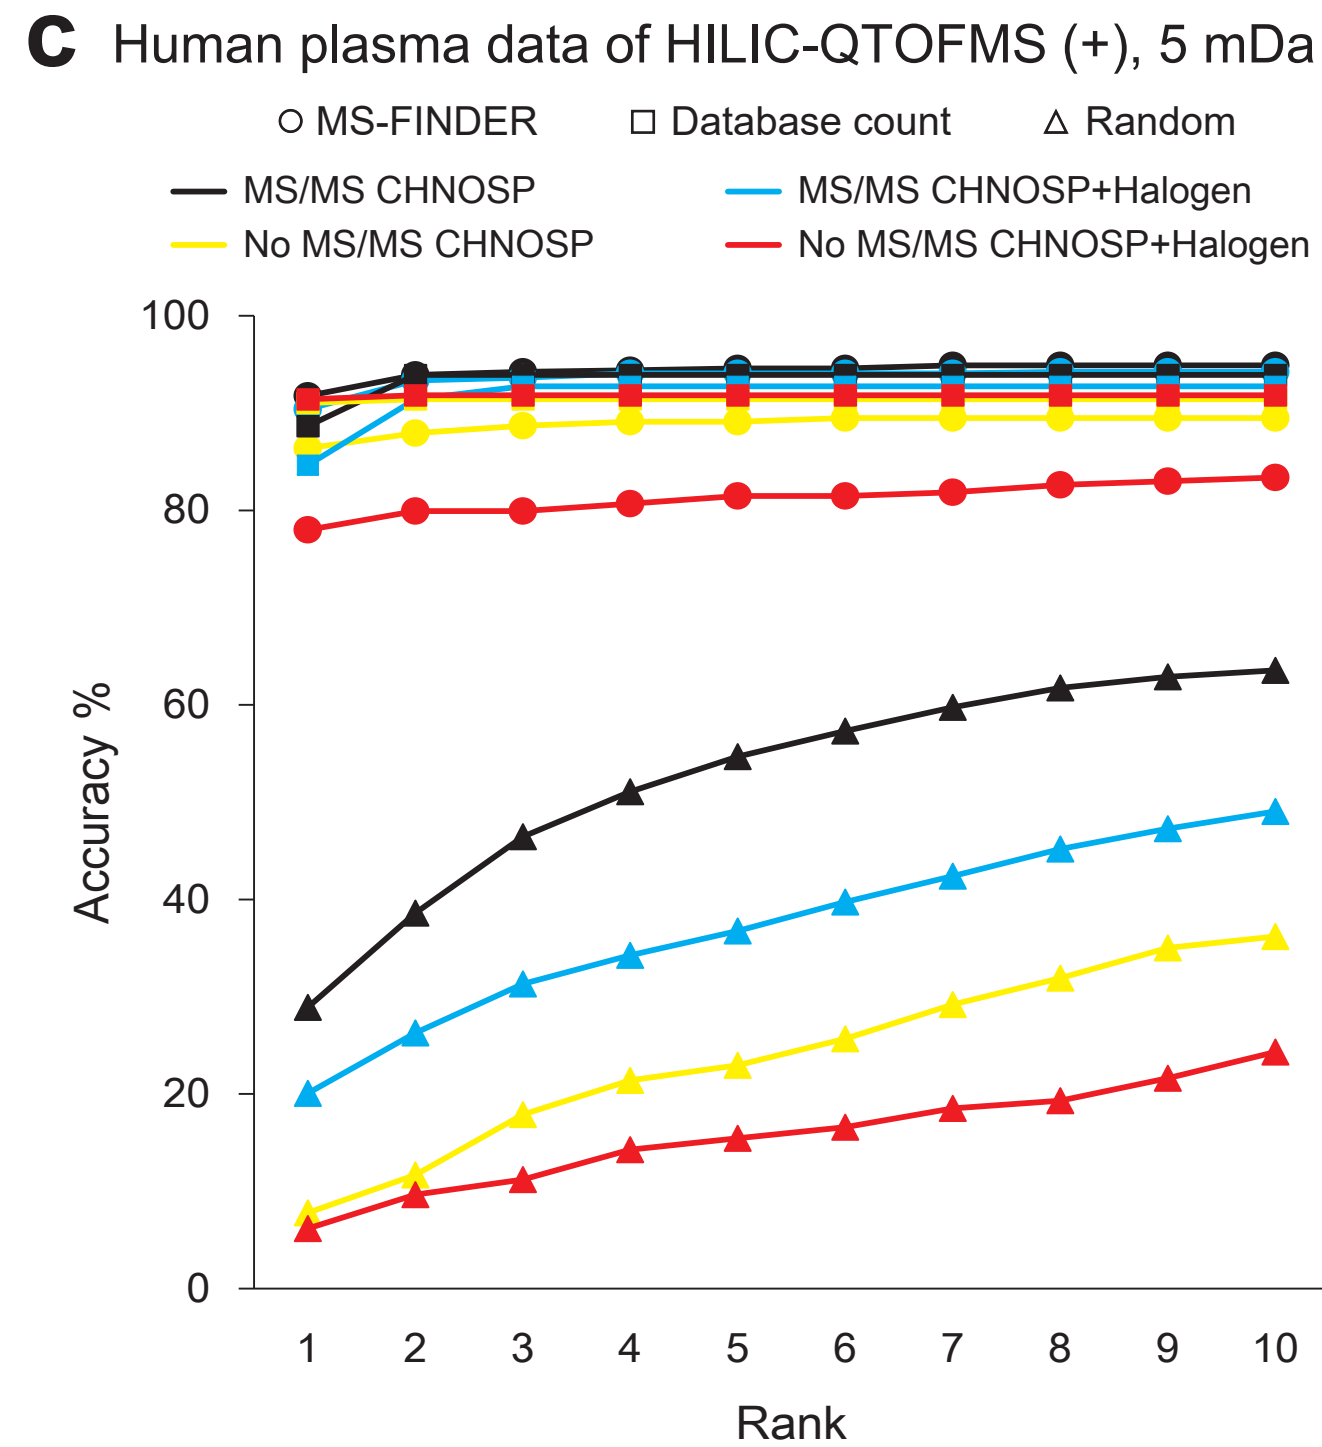

Supplement: NIHMS869808-supplement-support_info__4.pdf [file NIHMS869808-supplement-support_info__4.pdf]

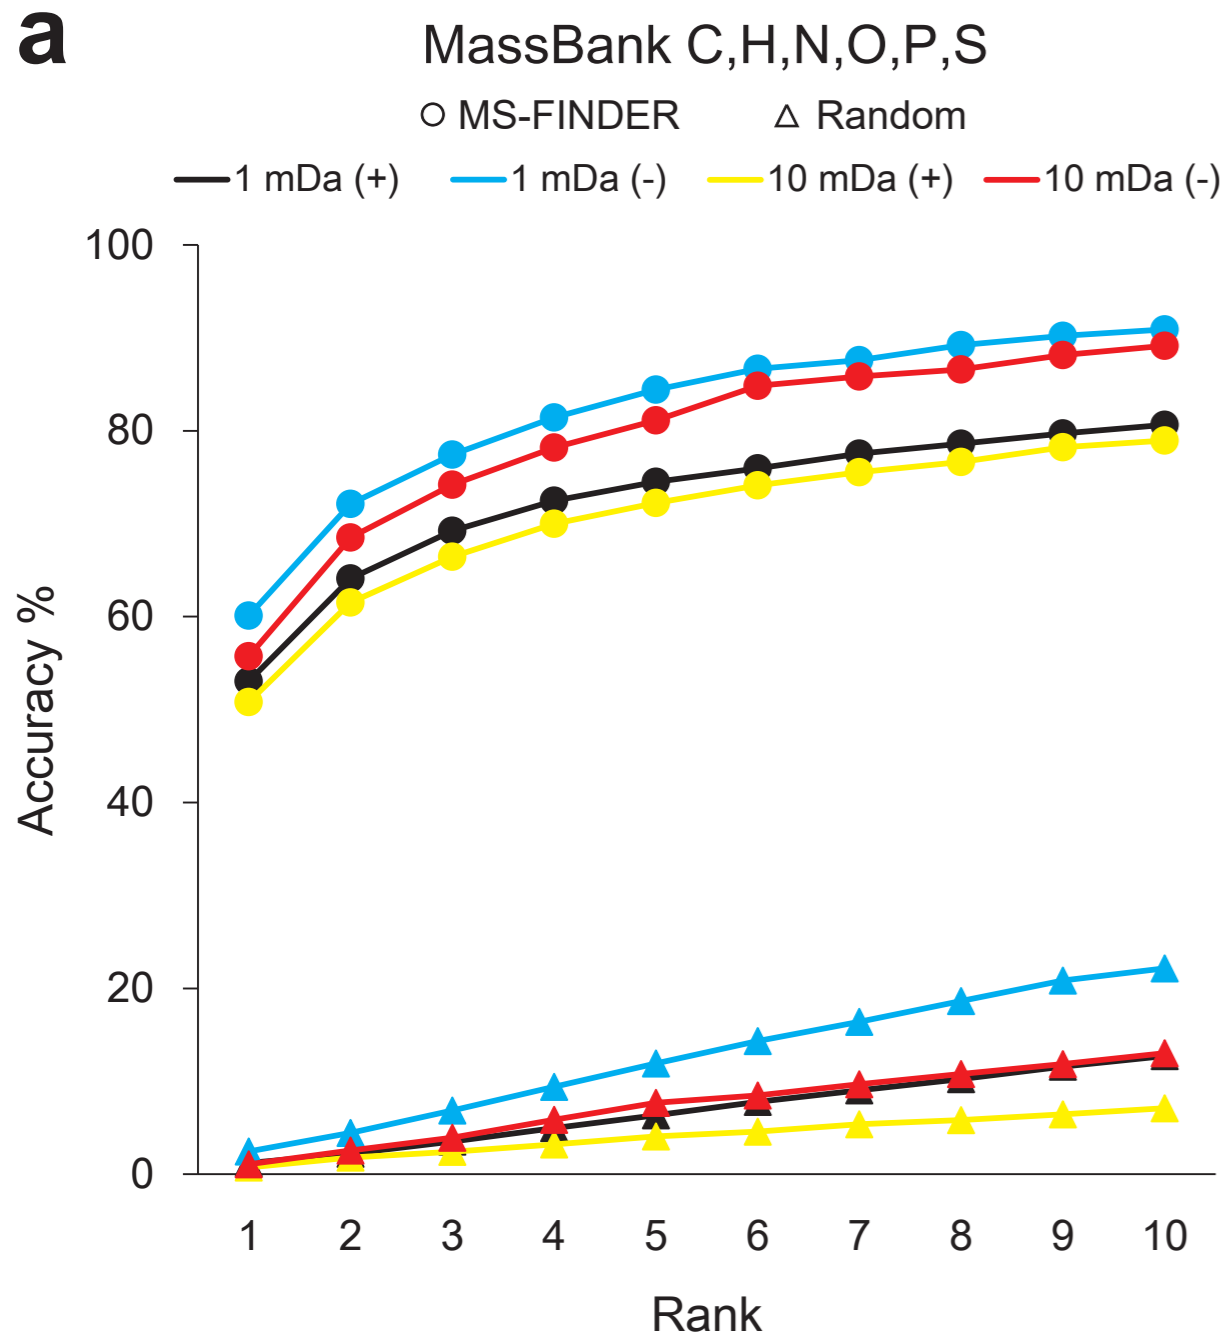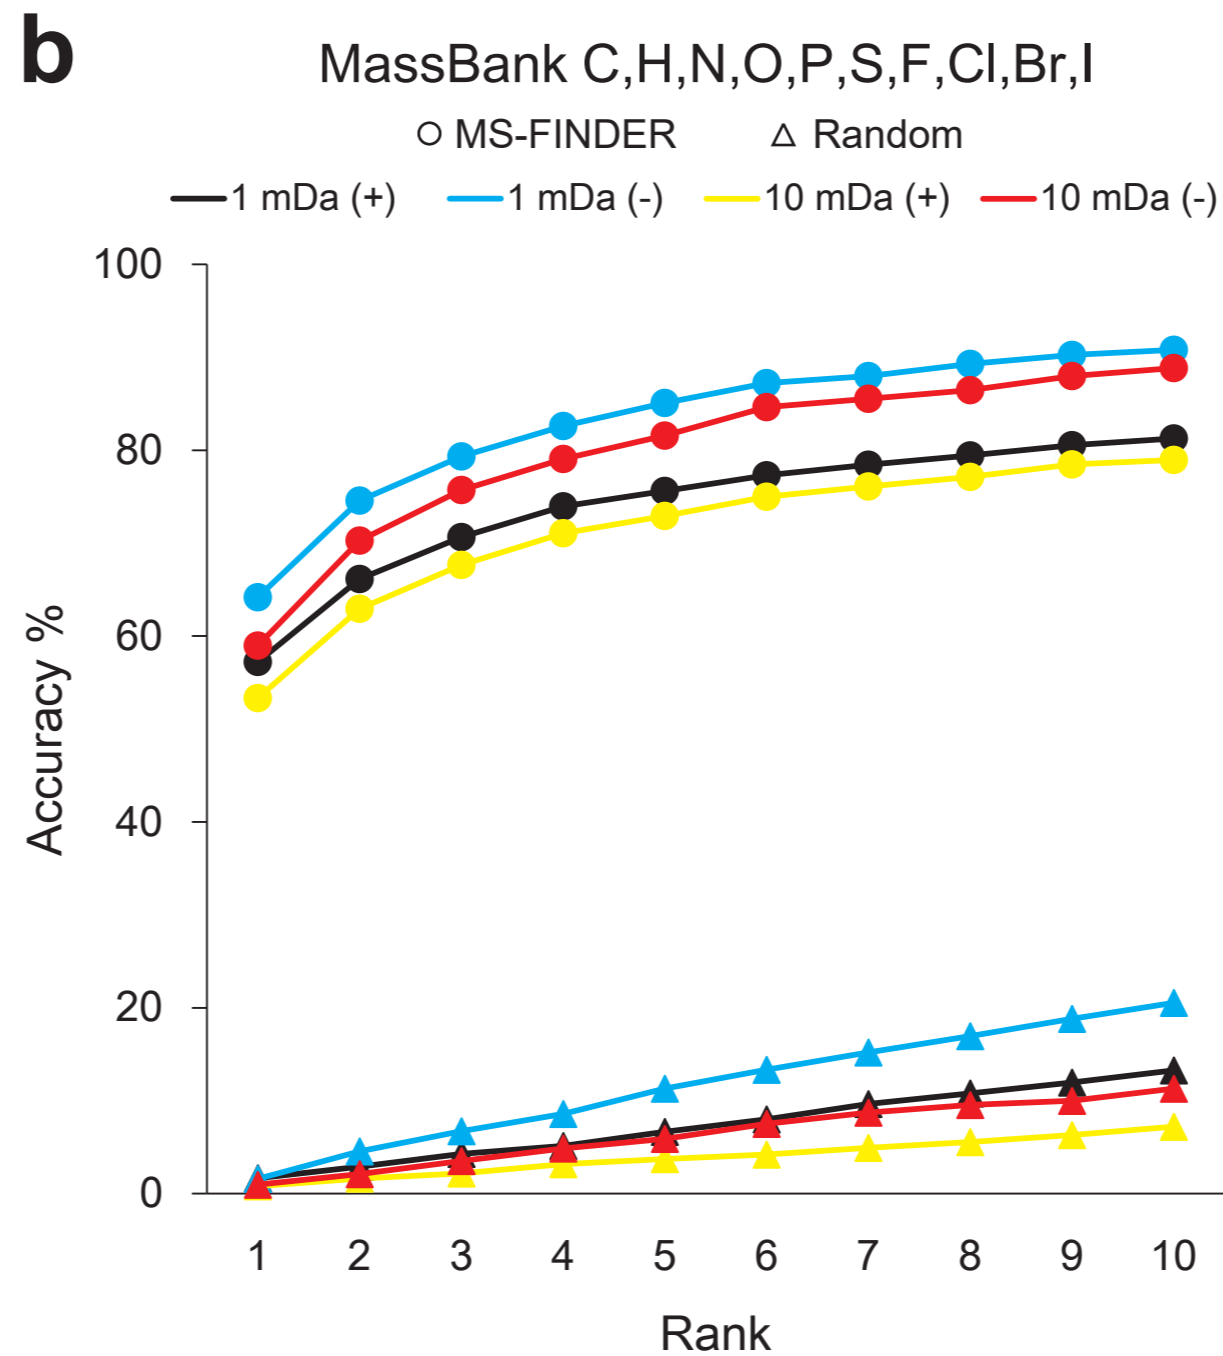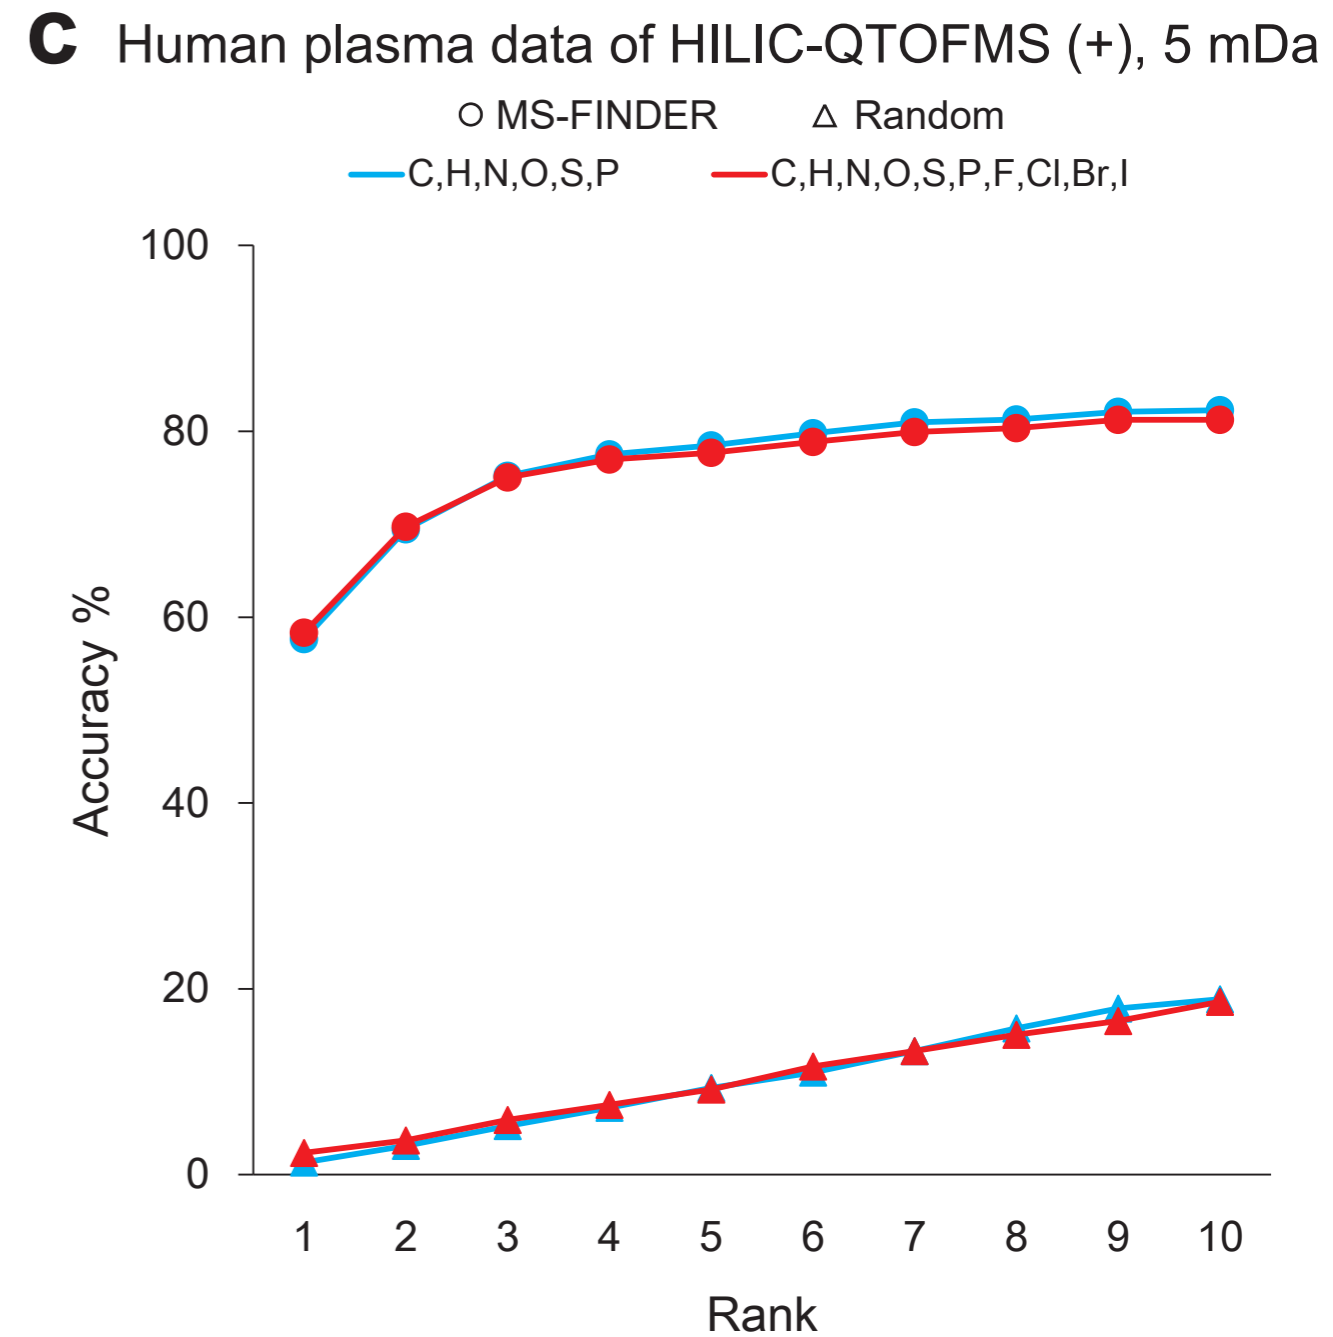

Supplement: NIHMS869808-supplement-support_info__5.pdf [file NIHMS869808-supplement-support_info__5.pdf]
